# Supplementary material for: New Cobalt (II) Complexes with Imidazole Derivatives: Antimicrobial Efficiency against Planktonic and Adherent Microbes and In Vitro Cytotoxicity Features
Source: PubMed Central journal article supplement (PMC7796409; doi:10.3390/molecules26010055), 2020-12-24
Supplement: molecules-26-00055-s001.pdf [file molecules-26-00055-s001.pdf]

Supplementary materials

# New cobalt (II) Complexes with Imidazole Derivatives Developed as Effective Antimicrobial and Antitumor Species

Alina Fudulu, Rodica Olar, Cătălin Maxim, Gina Vasile Scăețeanu, Coralia Bleotu, Lilia Matei, Mariana Carmen Chifiriuc and Mihaela Badea

**Table S1.** Selected angles (°) in (1)-(3).

| (1)  |       |      | (2)        |      |       | (3)  |            |      |       |       |            |
|------|-------|------|------------|------|-------|------|------------|------|-------|-------|------------|
| O(3) | Co(1) | O(1) | 106.14(11) | O(5) | Co(1) | O(1) | 106.23(14) | N(3) | Co(1) | C(1A) | 97.19(12)  |
| N(3) | Co(1) | O(1) | 92.87(12)  | N(2) | Co(1) | O(1) | 115.97(15) | N(2) | Co(1) | C(1A) | 133.93(14) |
| N(3) | Co(1) | O(3) | 113.21(12) | N(2) | Co(1) | O(5) | 103.02(14) | N(2) | Co(1) | N(3)  | 99.81(13)  |
| N(1) | Co(1) | O(1) | 111.55(13) | N(1) | Co(1) | O(1) | 114.02(16) | O(1) | Co(1) | C(1A) | 114.13(12) |
| N(1) | Co(1) | O(3) | 120.51(12) | N(1) | Co(1) | O(5) | 100.37(15) | O(1) | Co(1) | N(3)  | 103.37(12) |
| N(1) | Co(1) | N(3) | 109.05(13) | N(1) | Co(1) | N(2) | 114.77(17) | O(1) | Co(1) | N(2)  | 103.02(13) |
|      |       |      |            |      |       |      |            | O(3) | Co(1) | C(1A) | 29.67(11)  |
|      |       |      |            |      |       |      |            | O(3) | Co(1) | N(3)  | 102.88(12) |
|      |       |      |            |      |       |      |            | O(3) | Co(1) | N(2)  | 104.44(13) |
|      |       |      |            |      |       |      |            | O(3) | Co(1) | O(1)  | 137.73(11) |
|      |       |      |            |      |       |      |            | O(4) | Co(1) | C(1A) | 29.19(11)  |
|      |       |      |            |      |       |      |            | O(4) | Co(1) | N(3)  | 89.35(11)  |
|      |       |      |            |      |       |      |            | O(4) | Co(1) | N(2)  | 162.65(12) |
|      |       |      |            |      |       |      |            | O(4) | Co(1) | O(1)  | 88.97(10)  |
|      |       |      |            |      |       |      |            | O(4) | Co(1) | O(3)  | 58.86(10)  |
|      |       |      |            |      |       |      |            | O(2) | Co(1) | C(1A) | 85.25(11)  |
|      |       |      |            |      |       |      |            | O(2) | Co(1) | N(3)  | 160.44(12) |
|      |       |      |            |      |       |      |            | O(2) | Co(1) | N(2)  | 92.16(12)  |
|      |       |      |            |      |       |      |            | O(2) | Co(1) | O(1)  | 58.53(10)  |
|      |       |      |            |      |       |      |            | O(2) | Co(1) | O(3)  | 88.86(10)  |
|      |       |      |            |      |       |      |            | O(2) | Co(1) | O(4)  | 83.37(10)  |

|  |             |       |            |
|--|-------------|-------|------------|
|  | N(11) Co(3) | N(10) | 105.42(14) |
|  | O(12) Co(3) | N(10) | 103.76(14) |
|  | O(12) Co(3) | N(11) | 102.41(13) |
|  | O(9) Co(3)  | N(10) | 97.40(13)  |
|  | O(9) Co(3)  | N(11) | 104.84(14) |
|  | O(9) Co(3)  | O(12) | 139.35(15) |
|  | N(7) Co(2)  | N(6)  | 100.31(14) |
|  | O(5) Co(2)  | N(6)  | 102.57(13) |
|  | O(5) Co(2)  | N(7)  | 110.79(14) |
|  | O(7) Co(2)  | N(6)  | 110.42(13) |
|  | O(7) Co(2)  | N(7)  | 100.76(13) |
|  | O(7) Co(2)  | O(5)  | 128.74(13) |

**Table S2.** Continuous Shape Measures for the coordination polyhedron around the Co(II) atom.

| Geometry | Co1 (compound 1) | Co1 (compound 2) | Co3 (compound 3) |
|----------|------------------|------------------|------------------|
| PP-5     | 30.990           | 34.297           | 30.063           |
| vOC-5    | 7.796            | 8.032            | 4.109            |
| TBPY-5   | 3.318            | 3.020            | 5.782            |
| SPY-5    | 5.643            | 5.918            | 3.225            |
| JTBPY-5  | 4.249            | 3.820            | 6.493            |

| Geometry | Co1 (compound 3) |
|----------|------------------|
| HP-6     | 29.330           |
| PPY-6    | 23.830           |
| OC-6     | 4.345            |
| TPR-6    | 12.152           |
| JPPY-6   | 26.949           |

| Geometry | Co2 (compound 3) |
|----------|------------------|
| SP-4     | 30.034           |
| T-4      | 0.905            |
| SS-4     | 5.744            |
| vTBPY-4  | 2.774            |

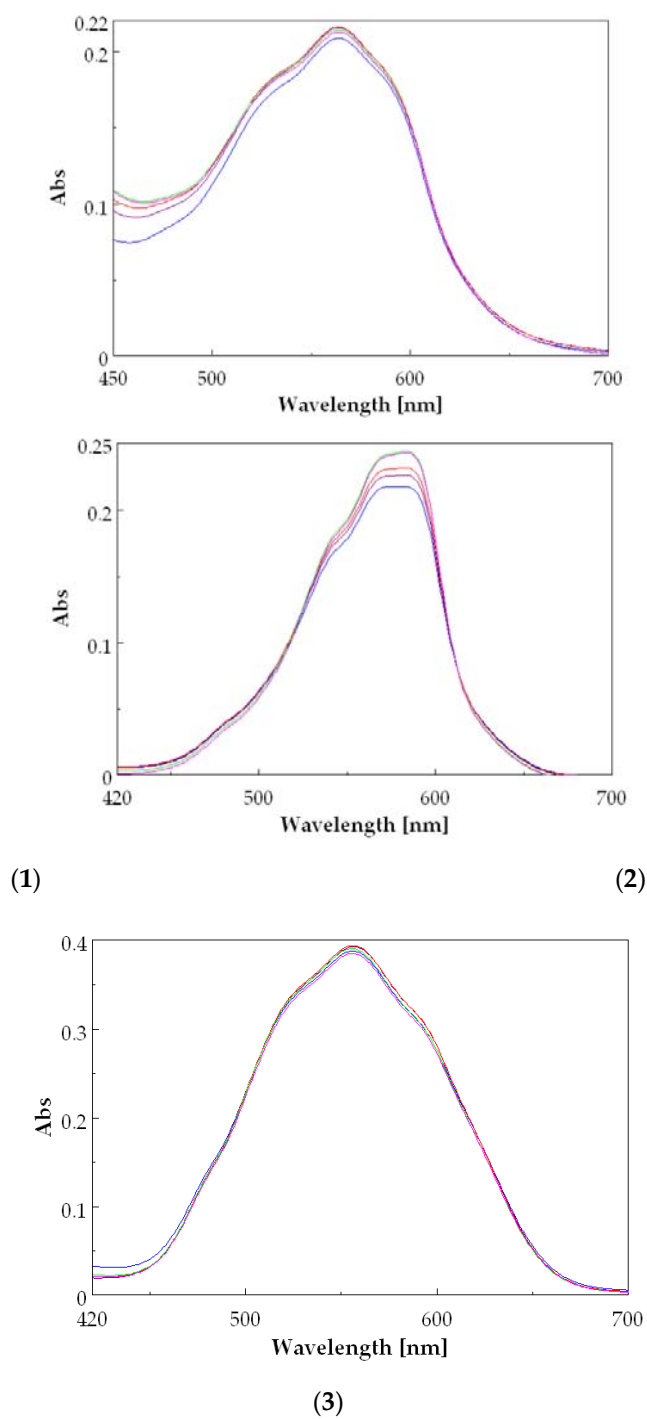

**Figure S1.** UV-Vis spectra in DMSO solution of complexes (1)-(3): (blue – 0 min, purple – 6 h, red – 12 h, green – 24 h, magenta -48h).

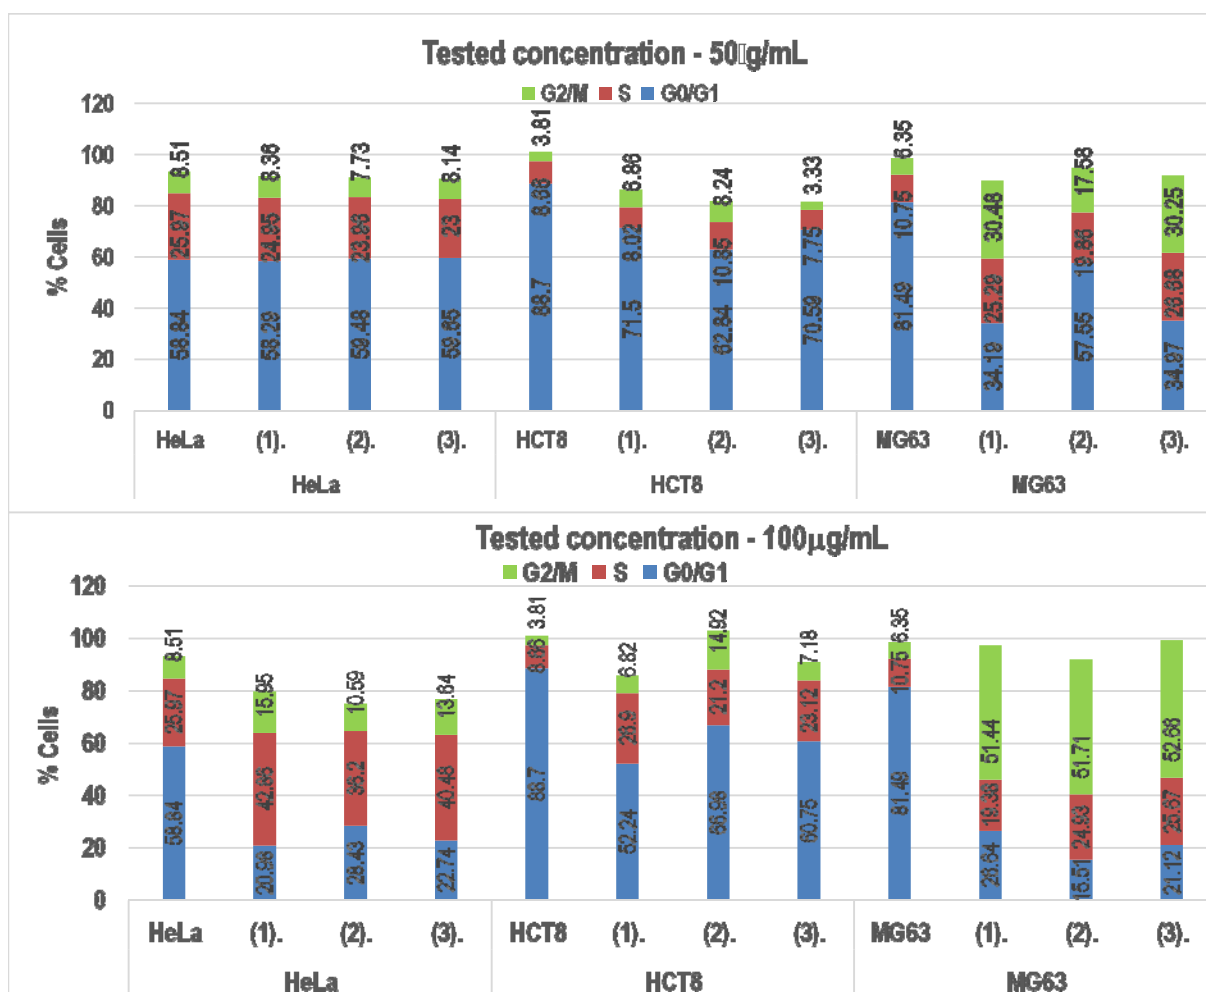

**Figure S2.** Effect of complexes (1) - (3) on cell cycle phases in HeLa, HCT8 and MG63 cells. The results are presented as percent of cells in different phases of the cell cycle.
